# Supplementary material for: The emergence of the tropical rainforest biome in the Cretaceous
Source: Copernicus journal article supplement (doi:10.5194/bg-20-1145-2023), 2023-03-27
Supplement: Supplementary file 1 [file bg-20-1145-2023-supplement.pdf]

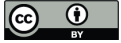

*Supplement of*

## **The emergence of the tropical rainforest biome in the Cretaceous**

**Clément Coiffard et al.**

*Correspondence to:* Haytham El Atfy (el-atfy@daad-alumni.de)

The copyright of individual parts of the supplement might differ from the article licence.

## 1 **Supplementary Text**

2 This file contains supporting information on the Campanian-Maastrichtian fossil plant  
3 assemblages of Egypt and Sudan as well as data concerning the Campanian Grünbach  
4 assemblage in information on assemblages which were compared. Furthermore, it contains  
5 additional details on the methods and results of our analyses. The sections are: 1) Morphotype  
6 catalog of the Northeastern African assemblages from the Campanian-Maastrichtian; 2)  
7 Diversity of the Northeastern Africa floras compared with other fossil and living samples.  
8 This part includes the source for the modern and fossil comparative collections mentioned in  
9 the article as well as the detailed data of the Grünbach assemblage based on Herman &  
10 Kvaček 2010; 3) CLANN code used in R to estimate the climatic parameters; 4) Results of  
11 the Climate Leaf Analysis with Neural Networks (CLANN) obtained using the above-  
12 mentioned code.  
13 The original scoresheet filed for Baris and used for the CLANN analysis is attached as  
14 separate document.

15

### 16 Diversity of the Northeastern Africa floras compared with other fossil and living samples

17 Diversity of the Northeastern Africa floras compared with other fossil and living samples  
18 We compared the diversity of fossil samples from Northeastern Africa with similar samples  
19 from the Cretaceous, Paleocene and Eocene. The data from Cerrejon, Castle Rock, Bison  
20 basin, Rio Negro, Barro Colorado were taken from Wing et al. (2009) completed with data  
21 from Hunco (Wilf et al., 2005) and Grünbach (Herman and Kvaček, 2010). The data from  
22 Grünbach are based on the number of specimens of each taxon mentioned as material given.

23

### 24 CLANN code used in R

```
25 clann <- function(physio, meteo, fossil,  
26  
27 spread=c(0.52,0.55,0.49,0.56,0.57,0.58,0.56,0.52,0.49,0.56,0.55)){  
28   # physio is the calibration matrix of physiological traits (column: traits, rows: localities)  
29   # meteo is the calibration matrix of meteorological data ( (column: parameters, rows:  
30   localities)  
31   # fossil is the matrix of fossil physiological traits that need to be assessed (each row is a  
32   different locality)  
33   # spread: set to FALSE to make the function recalculate the hyperparameters of the neural  
34   network.  
35   require(fields)  
36   if(all(!spread)) spread <- findSpread(physio, meteo, k=10)  
37   predict <- matrix(ncol=ncol(meteo), nrow=nrow(fossil))  
38   minp <- apply(physio,2,min)  
39   maxp <- apply(physio,2,max)  
40   norm_phys <- t(2*(t(physio)-minp)/(maxp-minp)-1)  
41   for (m in 1:nrow(fossil)){  
42     pred_it <- numeric(ncol(meteo))  
43     norm_f <- t(2*(t(fossil[m,])-minp)/(maxp-minp)-1)  
44     weights <- rdist(norm_phys,norm_f)  
45     for (k in 1:ncol(meteo)){  
46       b.input <- weights*0.8326/spread[k]  
47       a1 <- exp(-b.input^2)
```

```

1         weight_all <- sum(a1)
2         if(weight_all==0) weight_all <- 1
3         pred_it[k] <- crossprod(a1,as.matrix(meteo[,k]))/weight_all
4         }
5         predict[m,] <- pred_it
6     }
7     colnames(predict) <- colnames(meteo)
8     rownames(predict) <- rownames(fossil)
9     predict
10 }
11
12 findSpread <- function(x,y,k=10,r=200){
13 # x is the calibration matrix of physiological traits (column: traits, rows: localities)
14 # y is the calibration matrix of meteorological data ( (column: parameters, rows: localities)
15 # k is the nb of partitins for the k-fold cross validation
16 # r is the number of replicates
17 require(fields)
18 require(cvTools)
19 nr <- nrow(x)
20 cvr <- cvFolds(nr, K = k)
21 subcvr <- cvr$subsets
22 nm <- ncol(y)
23 rsquare_all <- matrix(nrow=r,ncol=nm)
24 for(s in 1:r){
25     predict <- matrix(nrow=nr,ncol=nm)
26     spread <- s/100
27     for(i in 1:k){
28         train.physg <- x[subcvr[cvr$which != i], ]
29         validation.physg <- x[subcvr[cvr$which == i], ]
30         train.met <- y[subcvr[cvr$which != i], ]
31         validation.met <- y[subcvr[cvr$which == i], ]
32         minp <- apply(train.physg,2,min)
33         maxp <- apply(train.physg,2,max)
34         train.physg <- t(2*(t(train.physg)-minp)/(maxp-minp)-1)
35         corr_validation.physg <- t(2*(t(validation.physg)-minp)/(maxp-minp)-1)
36         w.input <- rdist(train.physg,corr_validation.physg)
37         b.input <- w.input*0.8326/spread
38         a1 <- exp(-b.input^2)
39         weight_all <- colSums(a1)
40         for(h in 1:ncol(a1)){if(weight_all[h]==0){weight_all[h]<-1}}
41         pred_it <- (t(a1) %*% as.matrix(train.met))/weight_all
42         row.names(pred_it) <- row.names(validation.met)
43         predict[subcvr[cvr$which == i],] <- pred_it
44     }
45     res <- predict - y
46     stdev <- numeric(nm)
47     rsquare <- numeric(nm)
48     for(n in 1:ncol(res)){

```

```
1   if(all(predict[,n] == 0)){predict[1,n]=0.01}
2   stdev[n] <- sd(res[,n])
3   rsquare[n] <- cor(y[,n],predict[,n])^2
4   }
5   rsquare_all[s,] <- rsquare
6   }
7   best.spread <- numeric(nm)
8   test <- cbind((1:r)/100,rsquare_all)
9   for(nm in 1:nm) best.spread[nm] <- test[which.max(test[,nm+1]),1]
10  best.spread
11  }
12
13
```

1 **Table S1.**

| Morphotype | Synonyms                                                                                    | Reference                                                               | Cerrejon | affinities    | BA | KI | WA | NU | AB | QE | figured         | leaf size       |
|------------|---------------------------------------------------------------------------------------------|-------------------------------------------------------------------------|----------|---------------|----|----|----|----|----|----|-----------------|-----------------|
| M-01       | Annonophyllum seawardii Kahlert et al., Magnolia cf. hilgardiana Lesquereux                 | Kahlert et al., 2009                                                    |          | angiosperm    | 8  |    |    |    |    |    | B1597           | noto- mesophyll |
| M-02       |                                                                                             |                                                                         | CJ55     | Lauraceae     | 2  |    |    |    |    |    | B1602a          | mesophyll       |
| M-03       | Smlacites cf. mohgaensis Nambudiri                                                          | Kahlert et al., 2009                                                    |          | angiosperm    | 1  |    |    |    |    |    | B1602b          | mesophyll       |
| M-04       | Celtis pileoides Kahlert et al.                                                             | Kahlert et al., 2009                                                    | CJ48     | Salicaceae    | 2  |    |    |    |    |    | B1627           | microphyll      |
| M-05       | cf. Lauraceae, Ficus ramahensis Knowlton                                                    | Kahlert et al., 2009                                                    |          | angiosperm    | 4  |    |    |    |    |    | B1691           | mesophyll       |
| M-06       | Ficus ramahensis Knowlton                                                                   | Kahlert et al., 2009                                                    |          | angiosperm    | 4  |    |    |    |    |    | B1596           | notophyll       |
| M-07       | Ficus cf. celtidifolia Berry                                                                | Kahlert et al., 2009, Klitzsch and Lejal-Nicol, 1984                    |          | angiosperm    | 6  | 1  |    |    |    |    | B1704           | notophyll       |
| M-08       | Magnolia cf. hilgardiana Lesquereux                                                         | Kahlert et al., 2009                                                    |          | angiosperm    | 1  |    |    |    |    |    | B1589           | noto- mesophyll |
| M-09       |                                                                                             |                                                                         |          | angiosperm    | 3  |    |    |    |    |    | 340a            | notophyll       |
| M-10       | Magnolia sp.                                                                                | Kahlert et al., 2009                                                    |          | angiosperm    | 2  |    |    |    |    |    | B1600           | notophyll       |
| M-11       |                                                                                             |                                                                         |          | angiosperm    | 2  |    |    |    |    |    | 107c            | notophyll       |
| M-12       | Magnolia cf. hilgardiana Lesquereux                                                         | Kahlert et al., 2009                                                    |          | angiosperm    | 2  |    |    |    |    |    | B1692b          | notophyll       |
| M-13       |                                                                                             |                                                                         |          | angiosperm    | 3  |    |    |    |    |    | B1616           | notophyll       |
| M-14       | Ficus cf. precunia Lakhnupal, Oreodaphne sp.                                                | Kahlert et al., 2009                                                    |          | angiosperm    | 3  |    |    |    |    |    | B1597a          | notophyll       |
| M-15       | cf. Credneria daturaefolia Ward                                                             | Kahlert et al., 2009                                                    |          | angiosperm    | 1  |    |    |    |    |    | B1701           | mesophyll       |
| M-16       | Ficus pandurifolia Berry                                                                    | Kahlert et al., 2009                                                    |          | angiosperm    | 1  |    |    |    |    |    | B1607           | macrophyll      |
| M-17       | Dipterocarphyllum maximum Kahlert et al.                                                    | Kahlert et al., 2009                                                    |          | angiosperm    | 2  |    |    |    |    |    | B1593           | macrophyll      |
| M-18       |                                                                                             |                                                                         |          | angiosperm    | 1  |    |    |    |    |    | B1591           | macrophyll      |
| M-19       | Dipterocarphyllum maximum Kahlert et al.                                                    | Kahlert et al., 2009                                                    |          | angiosperm    | 2  |    |    |    |    |    | B1717           | macrophyll      |
| M-20       | Nelumbites virginensis Berry                                                                | Kahlert et al., 2009                                                    |          | angiosperm    | 3  |    |    |    |    |    | B1629           | aquatic         |
| M-21       | Nymphaeites desertorum Kräusel                                                              | Kahlert et al., 2009                                                    |          | Nymphaeales   | 3  |    |    |    |    |    | B1626           | aquatic         |
| M-22       |                                                                                             |                                                                         |          | angiosperm    | 1  |    |    |    |    |    | 89              | mesophyll       |
| M-23       |                                                                                             |                                                                         |          | angiosperm    | 2  |    |    |    |    |    | 129             | mesophyll       |
| M-24       |                                                                                             |                                                                         |          | angiosperm    | 1  |    |    |    |    |    | 164a            | notophyll       |
| M-25       | Nelumbo tenuifolium (Lesquereux) Knowlton, Nelumbites sp., Nelumbites giganteum Lejal-Nicol | Kahlert et al., 2009, Klitzsch and Lejal-Nicol, 1984, Lejal-Nicol, 1987 |          | Nelumbonaceae | 33 | 1  | ?  | 1  |    |    | B1616           | aquatic         |
| M-26       | Echinodorus cf. cordifolius (L.) Griesebach                                                 | Kahlert et al., 2009                                                    |          | monocot       | 2  |    |    |    |    |    | MB Pb 2016/799  | herbaceous      |
| M-27       |                                                                                             |                                                                         |          | monocot       | 3  |    |    |    |    |    | MB Pb 2016/806  | aquatic         |
| M-28       |                                                                                             |                                                                         |          | monocot       | 2  |    |    |    |    |    | MB Pb 2016/804  | aquatic         |
| M-29       | Pontederia bogneri Kahlert et al.                                                           | Kahlert et al., 2009                                                    | CJ59     | Araceae       | 45 |    |    |    |    |    | MB Pb 2016/803  | herbaceous      |
| M-30       | Protaphyllum sagenopteroides Lejal-Nicol                                                    | Lejal-Nicol, 1987                                                       | CJ47     | Araceae       | 2  |    |    |    | 13 |    | MB Pb 2016/802  | herbaceous      |
| M-31       | Araceae-Blatt-Fragment                                                                      | Kahlert et al., 2009                                                    | CJ3      | Araceae       | 6  |    |    |    |    |    | MB Pb 1997/1555 | herbaceous      |
| M-32       | Pontederia bogneri Kahlert et al., Zingiberites magnifolia (Knowlton) Hickey                | Kahlert et al., 2009                                                    | CJ49     | Zingiberales  | 7  |    |    |    |    |    | B1705           | herbaceous      |
| M-33       | Pontederia bogneri Kahlert et al.                                                           | Kahlert et al., 2009                                                    |          | monocot       | 4  |    |    |    |    |    | B1617           | herbaceous      |
| M-34       | Typhaephyllum sp.                                                                           | Lejal-Nicol, 1987                                                       |          | monocot       | 18 |    |    | 1  | 4  |    | 255             | herbaceous      |
| M-35       | Eichhornia primordialis Kahlert et al.                                                      | Kahlert et al., 2009                                                    |          | fern          | 14 |    |    |    |    |    | B1619           | aquatic         |
| M-36       |                                                                                             |                                                                         |          | fern          | 1  |    |    |    |    |    | B1694           | herbaceous      |
| M-37       |                                                                                             |                                                                         |          | fern          | 3  |    |    |    |    |    | B1695           | herbaceous      |
| M-38       | Salvinia sp.                                                                                | Kahlert et al., 2009                                                    |          | fern          | 31 |    |    |    |    |    | B0002           | aquatic         |
| M-39       | Dipterocarphyllum kischeibense Lejal-Nicol                                                  | Lejal-Nicol, 1987                                                       |          | angiosperm    | 1  | 1  |    |    |    |    | B666            |                 |
| M-40       |                                                                                             |                                                                         |          | angiosperm    | 1  |    |    |    |    |    | B665            |                 |
| M-41       |                                                                                             |                                                                         |          | angiosperm    | 1  |    |    |    |    |    | B670b           |                 |
| M-42       | Magnoliaephyllum sp., Laurophyllum sp.                                                      | Klitzsch and Lejal-Nicol, 1984                                          |          | angiosperm    | 4  |    |    |    |    |    | B670a           |                 |
| M-43       | cf. Dammaritens albens                                                                      | Lejal-Nicol, 1987                                                       |          | conifer       | 1  |    |    |    |    |    | B663            |                 |
| M-44       |                                                                                             |                                                                         |          | angiosperm    |    |    | 4  |    |    |    | B659a           |                 |
| M-45       |                                                                                             |                                                                         |          | angiosperm    |    |    | 1  |    |    | 1  | B651a           |                 |
| M-46       |                                                                                             |                                                                         |          | angiosperm    |    |    | 2  |    |    |    | B659b           |                 |
| M-47       |                                                                                             |                                                                         |          | angiosperm    |    |    | 3  | 2  |    |    | B646a           |                 |
| M-48       | Credneria sp.                                                                               | Klitzsch and Lejal-Nicol, 1984                                          |          | angiosperm    |    |    | 1  |    |    |    | B650            |                 |
| M-49       |                                                                                             |                                                                         |          | angiosperm    |    |    | 1  |    |    |    | B642a           |                 |
| M-50       | Ficophyllum sp.                                                                             | Klitzsch and Lejal-Nicol, 1984                                          |          | angiosperm    |    |    | 4  |    |    |    | B648            |                 |
| M-51       |                                                                                             |                                                                         |          | angiosperm    |    |    | 1  |    |    |    | B646c           |                 |
| M-52       | Cassiaephyllum aegyptiacum Lejal-Nicol                                                      | Lejal-Nicol, 1987                                                       |          | angiosperm    |    |    | 1  |    |    |    | B645            |                 |
| M-53       |                                                                                             |                                                                         |          | angiosperm    |    |    | 1  |    |    |    | B655            |                 |
| M-54       | cf. Rogersia angustifolia Fontaine                                                          | Klitzsch and Lejal-Nicol, 1984                                          |          | angiosperm    |    |    | 1  |    |    |    | B651a           |                 |
| M-55       | Magnoliaephyllum speciosa                                                                   | Lejal-Nicol, 1987                                                       |          | angiosperm    |    |    | 3  |    |    |    | B573a           |                 |
| M-56       | Magnoliaephyllum amplifolia                                                                 | Lejal-Nicol, 1987                                                       |          | angiosperm    |    |    | 3  |    | 3  |    | B57xa           |                 |
| M-57       | Laurophyllum africanum Lejal-Nicol et Dominik, Saicophyllum aswani Lejal-Nicol              | Lejal-Nicol, 1987                                                       |          | angiosperm    |    |    | 2  |    |    |    | B576b           |                 |
| M-58       |                                                                                             |                                                                         |          | angiosperm    |    |    | 1  |    |    |    | B577a           |                 |
| M-59       |                                                                                             |                                                                         |          | angiosperm    |    |    | 2  |    |    |    | B577b           |                 |
| M-60       |                                                                                             |                                                                         |          | angiosperm    |    |    | 6  |    |    |    | B791            |                 |
| M-61       |                                                                                             |                                                                         |          | angiosperm    |    |    | 2  |    |    |    | B819            |                 |
| M-62       |                                                                                             |                                                                         |          | angiosperm    |    |    | 1  |    |    |    | B817            |                 |
| M-63       |                                                                                             |                                                                         |          | monocot       |    |    | 1  |    |    |    | 7               |                 |
| M-64       | Salvinia sp.                                                                                | Lejal-Nicol, 1987                                                       |          | fern          |    |    | 3  |    | 7  |    | B810            |                 |
| M-65       |                                                                                             |                                                                         |          | angiosperm    |    |    |    |    | 1  |    | B160            |                 |
| M-66       |                                                                                             |                                                                         |          | angiosperm    |    |    |    |    | 1  |    | B152            |                 |
| M-67       |                                                                                             |                                                                         |          | angiosperm    |    |    |    |    | 3  |    | B171            |                 |
| M-68       | Dipterocarphyllum abyadense Lejal-Nicol                                                     | Lejal-Nicol, 1987                                                       |          | angiosperm    |    |    |    |    | 1  |    | 10              |                 |
| M-69       |                                                                                             |                                                                         |          | angiosperm    |    |    |    |    | 3  |    | 6               |                 |
| M-70       |                                                                                             |                                                                         |          | angiosperm    |    |    |    |    | 2  |    | 14              |                 |

2  
3 Morphotype catalog of the Northeastern African assemblages from the Campanian-  
4 Maastrichtian.

1 **Table S2.**

| Taxon                            | affinities | Number of specimens | Taxon                            | affinities | Number of specime |
|----------------------------------|------------|---------------------|----------------------------------|------------|-------------------|
| 1 Equisetites sp.                | ferns      | 1                   | 27 Compositiphyllum serratum     | dicots     |                   |
| 2 Gosaupteris danaeoides         | ferns      | 98                  | 28 Debeya insignis               | dicots     |                   |
| 3 Monheimia ungeri               | ferns      | 10                  | 29 Ettingshausenia gruenbachiana | dicots     |                   |
| 4 Microphylopteris austriaca     | ferns      | 42                  | 30 Ettingshausenia cf. Laevis    | dicots     |                   |
| 5 Coniopteris sp.                | ferns      | 1                   | 31 Ettingshausenia sp.           | dicots     |                   |
| 6 Cladophlebis gosauensis        | ferns      | 25                  | 32 Grebenkia europaea            | dicots     |                   |
| 7 Raphaelia lobifolia            | ferns      | 22                  | 33 Juglandiphyllites pelagicus   | dicots     |                   |
| 8 Sphenopteris heterophylla      | ferns      | 1                   | 34 Leguminosites mucronatus      | dicots     |                   |
| 9 Sphenopteris gruenbachia       | ferns      | 73                  | 35 Menispermities ettingshauseni | dicots     |                   |
| 10 Sphenopteris ungeri           | ferns      | 10                  | 36 Menispermities summesbergeri  | dicots     |                   |
| 11 Sphenopteris sp.              | ferns      | 1                   | 37 Myricophyllum serratum        | dicots     |                   |
| 12 Marsileaceaphyllum campanicum | ferns      | 15                  | 38 Myricophyllum sp.             | dicots     |                   |
| 13 Nilsonia cf. Holyi            | cycads     | 1                   | 39 Quereuxia angulata            | dicots     |                   |
| 14 Geinitzia reichenbachii       | conifers   | 43                  | 40 Rogersia sp.                  | dicots     |                   |
| 15 Geinitzia formosa             | conifers   | 19                  | 41 Ternstroemites neuweltensis   | dicots     |                   |
| 16 Pagiophyllum sp.              | conifers   | 1                   | 42 Viburniphyllum austriacum     | dicots     |                   |
| 17 Podozamites cf. Lanceolatus   | conifers   | 1                   | 43 Viburniphyllum ermanniorum    | dicots     |                   |
| 18 Lysichiton austriacus         | monocots   | 1                   | 44 Dicotylophyllum proteoides    | dicots     |                   |
| 19 Pandanites trinervis          | monocots   | 106                 | 45 Dicotylophyllum sp. 1         | dicots     |                   |
| 20 Gruenbachia pandanoides       | monocots   | 8                   | 46 Dicotylophyllum sp. 2         | dicots     |                   |
| 21 Sabalites longirachis         | monocots   | 54                  | 47 Dicotylophyllum sp. 3         | dicots     |                   |
| 22 Theiaiphyllum                 | monocots   | 23                  | 48 Dicotylophyllum sp. 4         | dicots     |                   |
| 23 Monocotyledon                 | monocots   | 1                   | 49 Dicotylophyllum sp. 5         | dicots     |                   |
| 24 Brassenites krasseri          | dicots     | 31                  | 50 Dicotylophyllum sp. 6         | dicots     |                   |
| 25 Celastrophyllum johannae      | dicots     | 10                  | 51 Dicotylophyllum sp. 7         | dicots     |                   |
| 26 Celastrophyllum sp.           | dicots     | 2                   | 52 Ceratoxylon sp.               | dicots     |                   |

2  
3 **Grünbach fossil collection**

4

5

1 **Table S3.**

|         | MAT   | WMMT  | CMMT  | GROWSEAS | GSP    | MMGSP | Three_WET | Three_DRY | RH    | SH    | ENTHAL |
|---------|-------|-------|-------|----------|--------|-------|-----------|-----------|-------|-------|--------|
| 2 Baris | 24.32 | 26.79 | 21.22 | 12.00    | 179.55 | 14.97 | 91.10     | 13.09     | 72.63 | 13.70 | 35.06  |

3 Results of the Climate Leaf Analysis with Neural Networks (CLANN)

4

5

1 **Data S1. (separate file)**

2

3 original scoresheet filed for Baris and used for the CLANN
